# Supplementary material for: Accelerated functional brain aging in major depressive disorder: evidence from a large scale fMRI analysis of Chinese participants
Source: PubMed Central journal article supplement (PMC9492670; doi:10.1038/s41398-022-02162-y), 2022-09-21
Supplement: 41398_2022_2162_MOESM1_ESM.pdf [file 41398_2022_2162_MOESM1_ESM.pdf]

# Supplementary Information: Accelerated functional brain aging in major depressive disorder: evidence from a large scale fMRI analysis of Chinese participants

Yunsong Luo<sup>1</sup>, Wenyu Chen<sup>1</sup>, Jiang Qiu<sup>2,3,4</sup> and Tao Jia<sup>1\*</sup>

<sup>1</sup>\*College of Computer and Information Science, Southwest University, Chongqing, 400715, P. R. China.

<sup>2</sup>School of Psychology, Southwest University (SWU), Chongqing, 400715, P. R. China.

<sup>3</sup>Key Laboratory of Cognition and Personality (SWU), Ministry of Education, Chongqing, 400715, P. R. China.

<sup>4</sup>Southwest University Branch, Collaborative Innovation Center of Assessment Toward Basic Education Quality at Beijing Normal University, Chongqing, 400715, P. R. China.

\*Corresponding author(s). E-mail(s): [tjia@swu.edu.cn](mailto:tjia@swu.edu.cn);

Contributing authors: [nickolas.luo@gmail.com](mailto:nickolas.luo@gmail.com);

[shanyu618@163.com](mailto:shanyu618@163.com); [qiu318@swu.edu.cn](mailto:qiu318@swu.edu.cn);

## 1 S1 Data acquisition

2 The REST-meta-MDD consortium contains a total of 25 neural cohorts from  
3 incoming groups in China. Site 4 (including 24 MDD patients and 24 controls)  
4 is excluded in that it is a duplicate of site 14 (detected during the preparation  
5 of REST-meta-MDD data for open sharing). We construct a functional con-  
6 nectivity network for each subject based on the AAL atlas using time series  
7 data from subjects at the remaining 24 sites. The specific information for each  
8 site is shown in Table S1 and Tabele S2. We take the step of adjusting the char-  
9 acteristics of all subjects by various normalization methods. Although these  
10 operations may have a slight effect on the final results, we consider these errors  
11 to be within reasonable control.

## 12 S2 Data preprocessing and quality control

13 The initial 10 functional images are discarded with the slice acquisition timing  
14 discrepancies and the head motion is performed. Linear trends, friston 24 head  
15 motion parameters, the white matter signal, and the cerebrospinal fluid signal  
16 are regressed out from the functional signal as nuisance covariates. We use  
17 the median to fill the vacancy values. Then, we use the Z-score normalization  
18 1 to normalize the functional connectivity of each subject, where  $\mu$  is the  
19 mean and  $\sigma$  is the standard deviation for each functional connectivity feature.  
20 The brain age estimation is then performed on the preprocessed functional  
21 connectivity data. We have also tested the Combat method. However, the  
22 accuracy of models all showed a decrease (Table S3 and Table S4).

$$z = \frac{x - \mu}{\sigma} \quad (1)$$

23 Our quality control is more relaxed compared to previous studies. We only  
24 remove duplicate samples from site 4 and three samples with abnormal age,  
25 resulting in 1276 MDD patients and 1101 controls. Various types of subjects  
26 are removed in Yan et al. [1] and Yang et al. [2], such as subjects from small  
27 sample sites, subjects younger than 18 or older than 65, subjects with vacan-  
28 cies in clinical characteristics, etc. We believe that the age distribution of the  
29 training set needs to be made as wide as possible for the model to have better  
30 generalizability. At the same time, the proposed algorithm predicts the brain  
31 age of subjects based on rsFC features, and the vacancies in clinical features  
32 do not affect the algorithm to predict the brain age of subjects based on their  
33 rsFC features.

## 34 S3 Stacking model

35 Stacking model is an ensemble learning approach that combines different pre-  
36 diction models in a single model, working at levels or layers. This approach  
37 aims to minimize the errors of generalization by reducing the bias of its gener-  
38 alizers. Considering a stacking approach using two levels (level-0 and level-1)  
39 in Fig. S1. In level-0, diverse base models are trained, and the prediction of the  
40 response variable for each one is performed subsequently. These forecasts are  
41 used as a new input feature for the level-1 model, which is also called meta-  
42 model [3]. At the same time, the base classifiers need to predict the test set,  
43 and the predictions are averaged as a new test set for the meta classifier to  
44 predict the desired result.

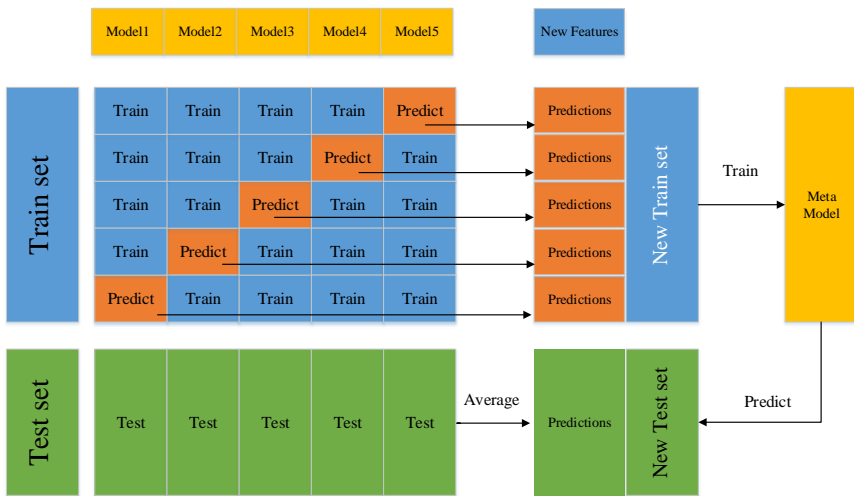

**Fig. S1:** Schematic diagram of two levels stacking.

## S4 Correcting the age dependence of brain-PAD

As shown in Fig. S2a and Fig. S3a, following many existing studies, we observe a significant correlation between brain-PAD and chronological age. It means that the predicted age tends to be biased towards the mean age of the cohort, implying that younger subjects will be predicted to be older and vice versa. To correct for the presence of regression dilution bias in age prediction, we train a linear regression model to fit the predicted age on the validation set with age labels set aside. Then the slope and intercept of this model are used to correct for the predicted age from the test set. The corrected predicted age and the correlation between corrected brain-PAD and chronological age are shown in Fig. S2b and Fig. S3b. Following Peng et al. [4], we define  $y$  to be chronological age and  $x$  to be the predicted age, and we fit a linear regression (Equation 2) to the hold-out validation set (with labels). The corrected predicted age is estimated by Equation 3.

$$x = ay + b \tag{2}$$

$$\hat{x} = \frac{x - b}{a} \tag{3}$$

This method requires (at the point of estimating  $a$  and  $b$  from  $x$  and  $y$ ) that the chronological ages are known. For the label-missing (final evaluation) test set, we assume that  $a$  and  $b$  are generalizable, and use the coefficients previously fit in the hold-out validation set to estimate the brain age.

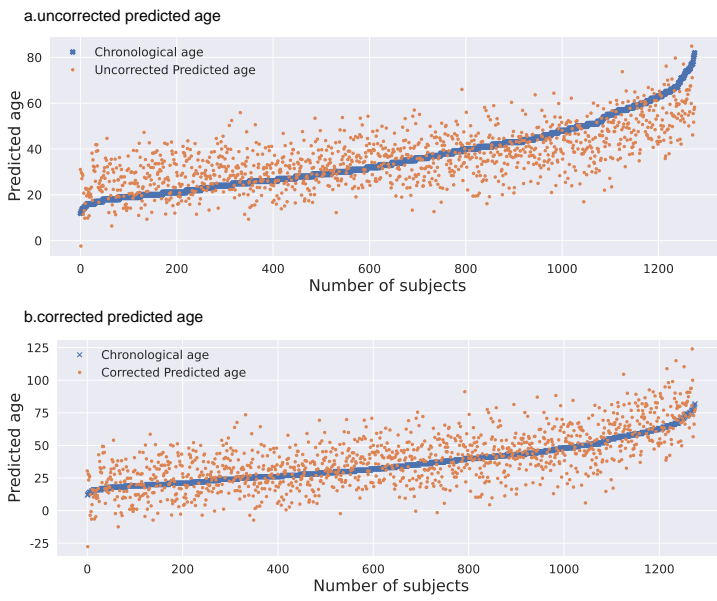

**Fig. S2:** Comparison of predicted age before and after correction.

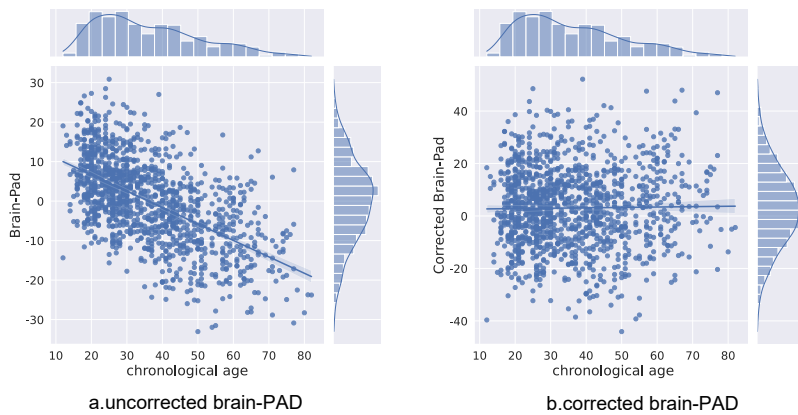

**Fig. S3:** Correlation between bran-PAD and chronological age.

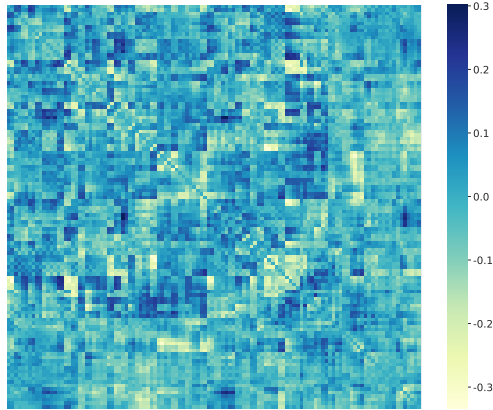

**Fig. S4:** Correlation between the functional connectivity features and the chronological age. Among all the total 6670 functional connectivity features, 3196 features show positive correlations with age mean correlation =  $0.0645 \pm 0.0495$ , range( $6.1691e - 05$ ,  $0.3017$ ). 3474 features show negative correlations with age mean correlation =  $-0.0691 \pm 0.0545$  with range( $-0.3334$ ,  $3.7818e - 05$ ).

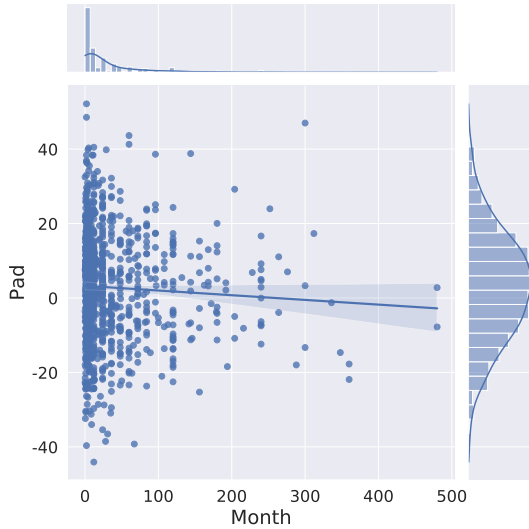

**Fig. S5:** The correlation between brain-PAD scores and illness duration months in patients with depression. There is a negative correlation between the brain-PAD and illness duration (Spearman  $R = -0.067$ ,  $p = 0.03$ ).

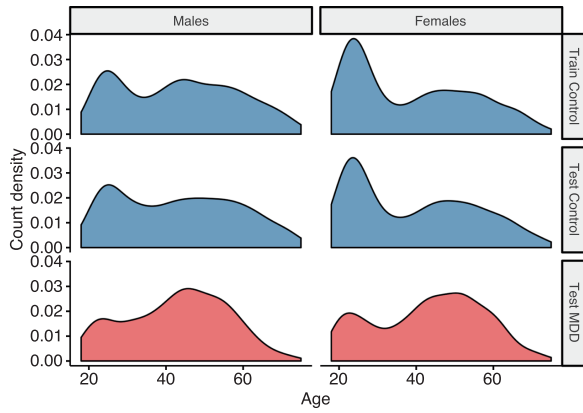

**Fig. S6:** Age distribution in ENIGMA. The ENIGMA MDD Working Group contains 6989 participants (18-75 years old).

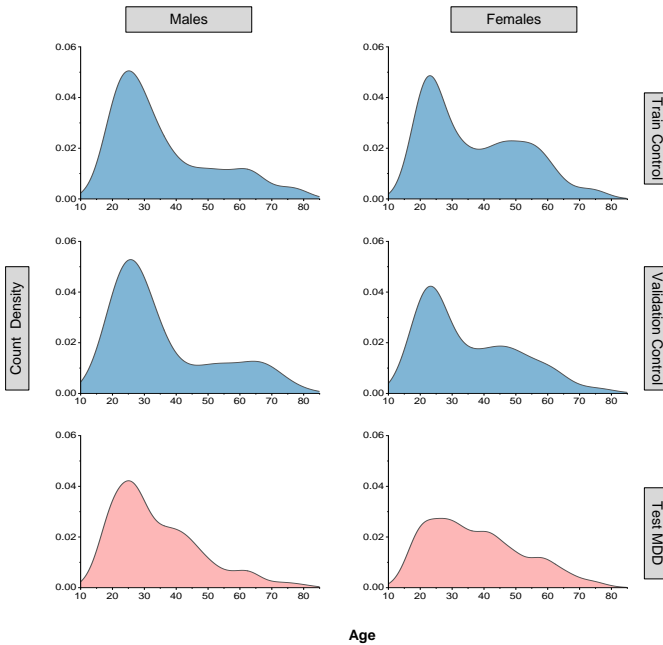

**Fig. S7:** Age distribution in Rest-meta-MDD. The Rest-meta-MDD contains 2377 participants (12-82 years old).

**Table S1:** Samples of selected sites.

| Serial number | Research groups                                                                         | MDD patients (n) | NCs (n) |
|---------------|-----------------------------------------------------------------------------------------|------------------|---------|
| 1             | National Clinical Research Center for Mental Disorders, Peking University               | 74               | 74      |
| 2             | The Affiliated Guangji Hospital of Soochow University                                   | 30               | 30      |
| 3             | The Second Xiangya Hospital of Central South University                                 | 27               | 37      |
| 5             | Department of Psychiatry, Shanghai Jiao Tong University School of Medicine              | 13               | 11      |
| 6             | Department of Psychiatry, Shanghai Jiao Tong University School of Medicine              | 15               | 15      |
| 7             | Sir Run Run Shaw Hospital, Zhejiang University School of Medicine                       | 38               | 49      |
| 8             | Department of Psychiatry, First Affiliated Hospital, China Medical University           | 75               | 75      |
| 9             | The First Affiliated Hospital of Jinan University                                       | 50               | 50      |
| 10            | First Hospital of Shanxi Medical University                                             | 50               | 33      |
| 11            | Department of Psychiatry, The First Affiliated Hospital of Chongqing Medical University | 32               | 29      |
| 12            | Department of Psychiatry, The First Affiliated Hospital of Chongqing Medical University | 32               | 6       |
| 13            | The First Affiliated Hospital of Xi an Jiaotong University, Xian Central Hospital       | 25               | 17      |
| 14            | The Second Xiangya Hospital of Central South University                                 | 64               | 32      |
| 15            | Zhongda Hospital, School of Medicine, Southeast University                              | 50               | 50      |
| 16            | Huaxi MR Research Center, West China Hospital of Sichuan University                     | 31               | 31      |
| 17            | Department of Psychiatry, The First Affiliated Hospital of Chongqing Medical University | 47               | 44      |
| 18            | The First Affiliated Hospital, College of Medicine, Zhejiang University                 | 21               | 20      |
| 19            | Anhui Medical University                                                                | 51               | 36      |
| 20            | Faculty of Psychology, Southwest University                                             | 282              | 251     |
| 21            | Beijing Anding Hospital, Capital Medical University                                     | 86               | 70      |
| 22            | The Institute of Mental Health, Second Xiangya Hospital of Central South University     | 30               | 20      |
| 23            | Mental Health Center, West China Hospital, Sichuan University                           | 32               | 30      |
| 24            | First Affiliated Hospital of Kunming Medical University                                 | 32               | 31      |
| 25            | Department of Neurology, Affiliated ZhongDa Hospital of Southeast University            | 89               | 63      |



**Table S2:** Data acquisition parameters of selected sites.

| Serial number | Scanner                       | Coil | TR (ms) | TE (ms) | Flip angle | Thickness/gap  | Slice number | Timepoints |
|---------------|-------------------------------|------|---------|---------|------------|----------------|--------------|------------|
| 1             | Siemens Tim Trio 3T           | 32   | 2000    | 30      | 90         | 4.0 mm/0.8 mm  | 30           | 210        |
| 2             | Philips Achieva 3T            | 8    | 2000    | 30      | 90         | 4.0 mm/0 mm    | 37           | 200        |
| 3             | Siemens 1.5 T                 | 16   | 2000    | 40      | 90         | 5.0mm/1.25mm   | 26           | 150        |
| 5             | GE Signa 3T                   | 32   | 3000    | 30      | 90         | 5.0mm/0 mm     | 22           | 100        |
| 6             | Siemens Tim Trio 3T           | 32   | 2000    | 30      | 70         | 4mm/0mm        | 33           | 180        |
| 7             | GE discovery MR750            | 8    | 2000    | 30      | 90         | 3.2 mm/0 mm    | 37           | 184        |
| 8             | GE Signa 3T                   | 8    | 2000    | 30      | 90         | 3.0 mm/0 mm    | 35           | 200        |
| 9             | GE Discovery MR750 3.0T       | 8    | 2000    | 25      | 90         | 3.0 mm/1.0 mm  | 35           | 200        |
| 10            | Siemens Tim Trio 3T           | 32   | 2000    | 30      | 90         | 3.0 mm/1.52 mm | 32           | 212        |
| 11            | GE Signa 3T                   | 8    | 2000    | 30      | 90         | 5 mm           | 33           | 200        |
| 12            | GE Signa 3T                   | 8    | 2000    | 30      | 90         | 5 mm           | 33           | 240        |
| 13            | GE Excite 1.5T                | 16   | 2500    | 35      | 90         | 4 mm/0 mm      | 36           | 150        |
| 14            | Siemens Tim Trio 3T           | 32   | 2500    | 25      | 90         | 3.5 mm/0 mm    | 39           | 200        |
| 15            | Siemens Verio 3.0T MRI        | 12   | 2000    | 25      | 90         | 4 mm/0 mm      | 36           | 240        |
| 16            | GE Signa 3T                   | 8    | 2000    | 30      | 90         | 5mm/0mm        | 30           | 200        |
| 17            | GE Signa 3T                   | 8    | 2000    | 40      | 90         | 4.0 mm/0 mm    | 33           | 240        |
| 18            | Philips Achieva 3.0 T scanner | 8    | 2000    | 35      | 90         | 5.0/1.0 mm     | 24           | 200        |
| 19            | GE Signa 3T                   | 8    | 2000    | 22.5    | 30         | 4.0 mm/0.6 mm  | 33           | 240        |
| 20            | Siemens Tim Trio 3T           | 12   | 2000    | 30      | 90         | 3.0 mm/1.0 mm  | 32           | 242        |
| 21            | Siemens Tim Trio 3T           | 32   | 2000    | 30      | 90         | 3.5 mm/0.7 mm  | 33           | 240        |
| 22            | Philips Gyroscan Achieva 3.0T | 32   | 2000    | 30      | 90         | 4.0 mm/0 mm    | 36           | 250        |
| 23            | Philips Achieva 3.0T TX       | 8    | 2000    | 30      | 90         | 4.0 mm/0 mm    | 38           | 240        |
| 24            | GE Signa 1.5T                 | 8    | 2000    | 40      | 90         | 5/1mm          | 24           | 160        |
| 25            | Siemens Verio 3T              | 12   | 2000    | 25      | 90         | 4.0mm/0 mm     | 36           | 240        |

**Table S3:** Comparison of models for Combat and Z-score (validation set)

| Validation set |                      |                     |
|----------------|----------------------|---------------------|
| Model          | MAE (Combat)         | MAE (Z-score)       |
| Elastic Net    | 13.5363 $\pm$ 4.6699 | 8.2327 $\pm$ 0.4608 |
| Ridge          | 12.9766 $\pm$ 3.6070 | 8.7749 $\pm$ 0.5662 |
| Bayesian Ridge | 12.1408 $\pm$ 4.2740 | 7.8057 $\pm$ 0.4420 |
| Stacking       | 11.0202 $\pm$ 4.5119 | 7.7287 $\pm$ 0.5547 |

**Table S4:** Comparison of models for Combat and Z-score (test set)

| Test set       |                      |                     |
|----------------|----------------------|---------------------|
| Model          | MAE (Combat)         | MAE (Z-score)       |
| Elastic Net    | 12.1243 $\pm$ 0.0916 | 8.4156 $\pm$ 0.0582 |
| Ridge          | 16.1888 $\pm$ 0.7375 | 9.4921 $\pm$ 0.2447 |
| Bayesian Ridge | 12.8572 $\pm$ 0.3426 | 8.3817 $\pm$ 0.0609 |
| Stacking       | 11.2833 $\pm$ 0.1501 | 8.3055 $\pm$ 0.0535 |

**Table S5:** Comparison of brain-PAD in different models.

| Model      | MDD-NC(Mean-PAD) | <i>P</i> value | Cohen's <i>d</i> |
|------------|------------------|----------------|------------------|
| SVM-linear | 5.215            | 4.09e-09       | 0.32             |
| EN         | 3.282            | 5.88e-05       | 0.23             |
| Ridge      | 5.186            | 5.22e-09       | 0.32             |
| BR         | 4.532            | 3.55e-08       | 0.31             |

**Table S6:** Performance of different models.

| Validation set |                      |                         |                      |
|----------------|----------------------|-------------------------|----------------------|
| Model          | MAE                  | MSE                     | R <sup>2</sup>       |
| SVM-linear     | 8.9308 $\pm$ 0.6309  | 132.4733 $\pm$ 20.3135  | 0.4482 $\pm$ 0.0771  |
| SVM-RBF        | 11.6761 $\pm$ 0.8564 | 231.1530 $\pm$ 30.6658  | 0.04127 $\pm$ 0.0647 |
| RandomForest   | 15.1180 $\pm$ 1.3921 | 433.7388 $\pm$ 57.8672  | -0.8006 $\pm$ 0.1541 |
| MLP            | 12.3220 $\pm$ 0.5293 | 247.6958 $\pm$ 20.3218  | -0.1595 $\pm$ 0.0951 |
| XGBoost        | 23.3025 $\pm$ 1.8482 | 776.5373 $\pm$ 110.7799 | -2.2516 $\pm$ 0.5404 |
| Test set       |                      |                         |                      |
| SVM-linear     | 9.6537 $\pm$ 0.3379  | 148.42189 $\pm$ 9.4821  | 0.3051 $\pm$ 0.0443  |
| SVM-RBF        | 11.0753 $\pm$ 0.0464 | 205.1567 $\pm$ 3.4306   | 0.0395 $\pm$ 0.0160  |
| RandomForest   | 15.4476 $\pm$ 0.1794 | 408.0862 $\pm$ 8.6558   | -0.9104 $\pm$ 0.0405 |
| MLP            | 13.2508 $\pm$ 4.1303 | 278.9408 $\pm$ 167.5347 | -0.5317 $\pm$ 0.4558 |
| XGBoost        | 34.2420 $\pm$ 0.1923 | 1590.5002 $\pm$ 22.9607 | -6.4457 $\pm$ 0.1074 |

**Table S7:** Comparison of brain-PAD between different clinical characteristics.

| MDD vs NC            | Number | Brain-PAD | <i>P</i> value | SD    | Cohen's <i>d</i> | 95% CI     |
|----------------------|--------|-----------|----------------|-------|------------------|------------|
| MDD                  | 1276   | 4.43      | 3.49e-08       | 15    | 0.31             | 2.23-3.88  |
| First-episode MDD    | 538    | 4.19      | 7.80e-06       | 14.99 | 0.31             | 1.54-4.08  |
| Recurrent episode    | 282    | 2.56      | 2.10e-02       | 14.85 | 0.20             | -0.55-2.93 |
| antidepressant users | 408    | 4.75      | 3.99e-06       | 15.62 | 0.34             | 1.85-4.90  |
| Medication free      | 447    | 2.66      | 7.16e-03       | 15.41 | 0.19             | -0.14-2.72 |
| Male                 | 463    | 5.07      | 1.85e-07       | 14.89 | 0.37             | 2.34-5.05  |
| Female               | 813    | 4.06      | 2.30e-06       | 15.06 | 0.29             | 1.65-3.73  |

**Table S8:** Comparison of brain-PAD in education years and illness duration months.

| MDD subgroup      | Number | Brain-PAD |
|-------------------|--------|-----------|
| Education<12      | 634    | 4.2       |
| Education>=12     | 642    | 1.92      |
| Duration <6       | 329    | 4.05      |
| Duration <12      | 461    | 3.7       |
| 6<= Duration <12  | 132    | 2.83      |
| 12<= Duration <24 | 130    | 2.48      |
| Duration >=12     | 524    | 2.01      |
| Duration >=24     | 394    | 1.86      |

## 64 References

- 65 [1] Yan, C.-G., Chen, X., Li, L., Castellanos, F.X., Bai, T.-J., Bo, Q.-J., Cao,  
66 J., Chen, G.-M., Chen, N.-X., Chen, W., *et al.*: Reduced default mode  
67 network functional connectivity in patients with recurrent major depressive  
68 disorder. *Proceedings of the National Academy of Sciences* **116**(18), 9078–  
69 9083 (2019)
- 70 [2] Yang, H., Chen, X., Chen, Z.-B., Li, L., Li, X.-Y., Castellanos, F.X., Bai,  
71 T.-J., Bo, Q.-J., Cao, J., Chang, Z.-K., *et al.*: Disrupted intrinsic func-  
72 tional brain topology in patients with major depressive disorder. *Molecular*  
73 *psychiatry*, 1–9 (2021)
- 74 [3] Shamaei, E., Kaedi, M.: Suspended sediment concentration estimation by  
75 stacking the genetic programming and neuro-fuzzy predictions. *Applied*  
76 *Soft Computing* **45**, 187–196 (2016)
- 77 [4] Peng, H., Gong, W., Beckmann, C.F., Vedaldi, A., Smith, S.M.: Accurate  
78 brain age prediction with lightweight deep neural networks. *Medical image*  
79 *analysis* **68**, 101871 (2021)
